# Supplementary material for: Treatment with Botulinum Neurotoxin Improves Activities of Daily Living and Quality of Life in Patients with Upper Limb Tremor
Source: PubMed Central journal article supplement — Tremor Other Hyperkinet Mov (N Y). 2019 Jul 26;9:10.7916/tohm.v0.640. doi: 10.7916/tohm.v0.640 (PMC6691906; doi:10.7916/tohm.v0.640), 2019-07-26
Supplement: tre-09-640-s001.pdf [file tre-09-640-s001.pdf]

| Drugs            |                  | All patients | Essential tremor | Holmes tremor | Other tremors |
|------------------|------------------|--------------|------------------|---------------|---------------|
| Family           | Name             |              |                  |               |               |
| Betablockers     | Propranolol      | 30           | 24               | 1             | 5             |
| Barbiturate      | Primidone        | 17           | 15               | 0             | 2             |
|                  | Phenobarbital    | 2            | 2                | 0             | 0             |
| Anti-convulsants | Gabapentine      | 21           | 16               | 1             | 4             |
|                  | Topiramate       | 16           | 12               | 0             | 4             |
|                  | Zonizamide       | 2            | 2                | 0             | 0             |
|                  | Levetiracetam    | 3            | 2                | 1             | 0             |
|                  | Carbamazepine    | 2            | 1                | 1             | 0             |
|                  | Pregabalin       | 1            | 0                | 1             | 0             |
|                  | Sodium valproate | 1            | 0                | 1             | 0             |
|                  | Lamotrigine      | 1            | 0                | 1             | 0             |
| Dopaminergic     | L-dopa           | 19           | 10               | 6             | 3             |
|                  | Piribedil        | 6            | 4                | 1             | 1             |
|                  | Ropinirole       | 5            | 4                | 1             | 0             |
|                  | Rotigotine       | 1            | 1                | 0             | 0             |
|                  | Pergolide        | 1            | 0                | 1             | 0             |
|                  | Bromocriptine    | 2            | 0                | 2             | 0             |
|                  | Lisuride         | 1            | 0                | 1             | 0             |
|                  | Apomorphine      | 1            | 0                | 1             | 0             |
| Benzodiazepines  | Clonazepam       | 11           | 6                | 4             | 1             |
|                  | Others           | 4            | 4                | 0             | 0             |
| Anticholinergic  | Trihexiphenidyl  | 10           | 3                | 4             | 3             |
| Miscellaneous    | Oxtripitan       | 5            | 2                | 2             | 1             |
|                  | Buspirone        | 5            | 2                | 3             | 0             |
|                  | Tetrabenazine    | 2            | 0                | 2             | 0             |
|                  | Amantadine       | 2            | 2                | 0             | 0             |
|                  | Rasagiline       | 2            | 2                | 0             | 0             |
|                  | Baclofene        | 3            | 0                | 3             | 0             |
|                  | Dantrolene       | 2            | 0                | 2             | 0             |

---

|              |   |   |   |   |
|--------------|---|---|---|---|
| Piracetam    | 2 | 1 | 1 | 0 |
| Buflomedil   | 1 | 0 | 1 | 0 |
| Clomipramine | 1 | 0 | 1 | 0 |

---

Supplementary Table 1. *Per os* medications tried unsuccessfully prior to Botulinum toxin injections.

Supplementary Table 2. Doses of botulinum neurotoxin (onabotulinumtoxin A units) in the treatment of upper limb tremor, by target muscle. The data reflect all the injections performed during the entire course of the disease in each patient. The table also indicates how frequently each target muscle was treated (number of patients, and number of injection cycles).

| Muscle                         | All patients (n=38)                    |                       | Essential tremor (n=21)                |                       | Holmes tremor (n=8)                    |                       |
|--------------------------------|----------------------------------------|-----------------------|----------------------------------------|-----------------------|----------------------------------------|-----------------------|
|                                | Number of: patients / injection cycles | Dose                  | Number of: patients / injection cycles | Dose                  | Number of: patients / injection cycles | Dose                  |
| Flexor pollicis longus         | 3 (7.9%) / 14 (0.5%)                   | 7.6±2.8; 10 (4-10)    | 0 / 0                                  | -                     | 1 (12.5%) / 8 (0.7%)                   | 10±0; 10 (10-10)      |
| Adductor pollicis brevis       | 1 (2.6%) / 1 (0.03%)                   | 10±NC; 10 (10-10)     | 1 (4.8%) / 1 (0.07%)                   | 10.00±NC; 10 (10-10)  | 0 / 0                                  | -                     |
| Flexor pollicis brevis         | 1 (2.6%) / 1 (0.03%)                   | 5±NC; 5 (5-5)         | 1 (4.8%) / 1 (0.07%)                   | 5.00±NC; 5 (5-5)      | 0 / 0                                  | -                     |
| Abductor pollicis longus       | 3 (7.9%) / 9 (0.3%)                    | 6.0±2.0; 6 (4-10)     | 2 (9.5%) / 5 (0.4%)                    | 7.20±1.8; 7 (5-10)    | 0 / 0                                  | -                     |
| Extensor pollicis longus       | 3 (7.9%) / 9 (0.3%)                    | 5.7±1.6; 5 (4-8)      | 2 (9.5%) / 5 (0.4%)                    | 6.80±1.1; 7 (5-8)     | 0 / 0                                  | -                     |
| Extensor indicis               | 1 (2.6%) / 5 (0.2%)                    | 8.3±2.3; 9.5 (5-10)   | 1 (4.8%) / 1 (0.07%)                   | 5.00±NC; 5 (5-5)      | 1 (12.5%) / 5 (0.4%)                   | 9.0±1.7; 10 (6-10)    |
| Extensor digitorum             | 2 (5.3%) / 3 (0.1%)                    | 15.0±8.7; 20 (5-20)   | 2 (9.5%) / 3 (0.2%)                    | 15.00±8.7; 20 (5-20)  | 0 / 0                                  | -                     |
| Flexor digitorum superficialis | 2 (5.3%) / 4 (0.1%)                    | 8.8±1.9; 9.5 (6-10)   | 1 (4.8%) / 2 (0.1%)                    | 10.00±0; 10 (10-10)   | 1 (12.5%) / 2 (0.2%)                   | 7.50±2.1; 7.5 (6-9)   |
| Flexor digitorum profundis     | 2 (5.3%) / 21 (0.7%)                   | 25.8±12.1; 20 (5-40)  | 0 / 0                                  | -                     | 1 (12.5%) / 17 (1.5%)                  | 28.8±11.1; 20 (10-40) |
| Pronator quadratus             | 13 (34.2%) / 96 (3.2%)                 | 21.6±10.0; 20 (10-50) | 11 (52.4%) / 85 (5.9%)                 | 21.9±10.7; 20 (10-50) | 2 (25.0%) / 12 (1.0%)                  | 19.6±4.0; 20 (15-30)  |
| Pronator teres                 | 29 (76.3%) / 272 (9.1%)                | 20.2±9.3; 20 (10-60)  | 19 (90.5%) / 182 (12.6%)               | 21.3±10.5; 20 (10-60) | 4 (50.0%) / 34 (2.9%)                  | 19.1±7.5; 20 (10-30)  |
| Supinator                      | 28 (73.7%) / 205 (6.8%)                | 18.8±8.3; 15 (5-50)   | 20 (95.2%) / 146 (10.1%)               | 19.5±9.3; 17.5 (5-50) | 4 (50.0%) / 21 (1.8%)                  | 15.0±5.0; 15 (10-25)  |
| Extensor carpi ulnaris         | 27 (71.1%) / 315 (10.5%)               | 17.4±9.5; 15 (5-50)   | 17 (81.0%) / 206 (14.3%)               | 16.4±9.8; 15 (5-50)   | 4 (50.0%) / 52 (4.5%)                  | 24.0±8.5; 25 (10-40)  |
| Extensor carpi radialis        | 25 (65.8%) / 300 (10.0%)               | 18.1±10.0; 15 (5-50)  | 16 (76.2%) / 190 (13.2%)               | 16.39±9.38; 15 (5-50) | 5 (50.0%) / 57 (4.9%)                  | 25.4±10.3; 25 (10-50) |

| Muscle                | All patients (n=38)                    |                        | Essential tremor (n=21)                |                       | Holmes tremor (n=8)                    |                        |
|-----------------------|----------------------------------------|------------------------|----------------------------------------|-----------------------|----------------------------------------|------------------------|
|                       | Number of: patients / injection cycles | Dose                   | Number of: patients / injection cycles | Dose                  | Number of: patients / injection cycles | Dose                   |
| Flexor carpi ulnaris  | 29 (76.3%) / 349 (11.6%)               | 22.0±15.4; 20 (5-65)   | 16 (79.2%) / 179 (12.4%)               | 17.0±8.2; 15 (5-50)   | 5 (62.5%) / 99 (8.5%)                  | 34.7±21.0; 25 (7.5-65) |
| Flexor carpi radialis | 28 (73.7%) / 342 (11.4%)               | 23.4±15.8; 20 (5-65)   | 16 (76.2%) / 178 (12.3%)               | 17.5±8.9; 15 (5-50)   | 5 (62.5%) / 115 (9.9%)                 | 35.5±19.8; 40 (7.5-65) |
| Brachio-radialis      | 7 (18.4%) / 70 (2.3%)                  | 32.1±8.5; 30 (10-60)   | 2 (9.5%) / 23 (1.6%)                   | 37.4±9.2; 40 (20-60)  | 3 (37.5%) / 44 (3.8%)                  | 29.9±6.4; 30 (20-50)   |
| Brachialis            | 6 (15.8%) / 59 (2.0%)                  | 28.4±8.2; 30 (10-40)   | 5 (23.8%) / 32 (2.2%)                  | 24.7±9.7; 25 (10-40)  | 2 (25.0%) / 29 (2.5%)                  | 32.6±2.5; 35 (30-35)   |
| Biceps brachialis     | 14 (36.8%) / 174 (5.8%)                | 34.9±11.7; 35 (10-80)  | 8 (38.1%) / 78 (5.4%)                  | 28.4±9.6; 30 (10-50)  | 5 (62.5%) / 93 (8.0%)                  | 39.2±9.8; 40 (20-60)   |
| Triceps brachialis    | 10 (26.3%) / 110 (3.7%)                | 40.2±11.0; 40 (10-60)  | 4 (19.1%) / 36 (2.5%)                  | 32.9±10.5; 30 (10-50) | 5 (62.5%) / 69 (5.9%)                  | 43.1±9.2; 40 (30-60)   |
| Deltoideus            | 16 (42.1%) / 192 (6.4%)                | 43.6±20.0; 40 (20-150) | 9 (42.9%) / 38 (2.6%)                  | 31.3±7.6; 30 (20-40)  | 5 (62.5%) / 146 (12.5%)                | 48.2±21.4; 50 (20-150) |
| Pectoralis major      | 9 (23.7%) / 169 (5.6%)                 | 50.9±14.7; 50 (20-100) | 4 (19.1%) / 22 (1.5%)                  | 35.9±7.5; 40 (20-50)  | 6 (75.0%) / 144 (12.3%)                | 53.4±14.3; 30 (30-100) |
| Dorsalis major        | 8 (21.1%) / 139 (4.6%)                 | 49.5±10.8; 50 (20-85)  | 2 (9.5%) / 17 (1.2%)                   | 34.4±7.5; 40 (20-40)  | 5 (62.5%) / 123 (10.5%)                | 51.4±9.5; 50 (30-85)   |
| Trapezius             | 4 (10.5%) / 30 (1.0%)                  | 41.33±8.09; 40 (25-50) | 0 / 0                                  | -                     | 3 (37.5%) / 25 (2.1%)                  | 42.8±7.8; 40 (25-50)   |
| Teres major           | 10 (26.3%) / 40 (1.3%)                 | 43.1±12.0; 45 (20-80)  | 3 (14.3%) / 5 (0.4%)                   | 40.0±7.1; 40 (30-50)  | 5 (62.5%) / 33 (2.8%)                  | 45.6±12.7; 50 (20-80)  |
| Teres minor           | 9 (23.7%) / 40 (1.3%)                  | 44.4±13.8; 40 (20-80)  | 3 (14.3%) / 5 (0.4%)                   | 36.7±10.3; 40 (20-50) | 5 (62.5%) / 23 (2.0%)                  | 40.4±13.0; 40 (20-80)  |
| Infra-spinatus        | 5 (13.2%) / 10 (0.3%)                  | 36.5±6.3; 35 (30-50)   | 3 (14.3%) / 3 (0.2%)                   | 33.3±5.8; 30 (30-40)  | 2 (25.0%) / 7 (0.6%)                   | 37.9±6.4; 35 (30-50)   |
| Supra-spinatus        | 1 (2.6%) / 9 (0.3%)                    | 38.89±3.33; 40 (30-40) | 0 / 0                                  | -                     | 0 / 0                                  | -                      |
| Levator scapulae      | 2 (5.3%) / 15 (0.5%)                   | 44.00±9.86; 50 (20-50) | 0 / 0                                  | -                     | 1 (12.5%) / 10 (0.9%)                  | 41.0±11.0; 45 (20-50)  |

Doses are quoted as the mean±standard deviation; median(min-max). SD: standard deviation; NC: not calculable (one injection only). The botulinum neurotoxin dose was calculated in onabotulinumtoxin A units, since the latter was used for the great majority of the injections. If another toxin was injected, the following ratios were used: incobotulinumtoxin A:onabotulinumtoxin A 1:1, abobotulinumtoxin A:onabotulinumtoxin A
